# Supplementary material for: Anaesthesia in PROstate Biopsy Pain Obstruction Study: A Study Protocol for a Multicentre Randomised Controlled Study Evaluating the Efficacy of Perineal Nerve Block in Controlling Pain in Patients Undergoing Transperineal Prostate Biopsy
Source: Frontiers journal article supplement (doi:10.3389/fsurg.2021.649822), 2021-10-06
Supplement: Data_Sheet_1.PDF [file Data_Sheet_1.PDF]

**Table supplement. The APROPOS Group**

| <b>Member</b>     | <b>Centre</b>                                                                                                 | <b>Ethics Board</b>                                                         | <b>Region</b>   |
|-------------------|---------------------------------------------------------------------------------------------------------------|-----------------------------------------------------------------------------|-----------------|
| Dr Bi-Ming He     | Department of Urology, Shanghai East Hospital, Tongji University School of Medicine                           | shanghai east hospital ethics committee                                     | Shanghai, China |
| Dr Rong-Bing Li   | Department of Urology, Shanghai East Hospital, Tongji University School of Medicine                           | shanghai east hospital ethics committee                                     | Shanghai, China |
| Dr Hai-Feng Wang  | Department of Urology, Shanghai East Hospital, Tongji University School of Medicine                           | shanghai east hospital ethics committee                                     | Shanghai, China |
| Dr Qing-song Yang | Department of Radiology, Changhai Hospital, Second military medical university                                | Changhai hospital ethics committee                                          | Shanghai, China |
| Dr Jun Xiao       | Department of Urology, The affiliated hospital of USTC, University of Science and Technology of China         | The affiliated hospital of USTC ethics committee                            | Hefei, China    |
| Dr Guang-Yuan Li  | Department of Urology, The Fourth Affiliated Hospital of Anhui Medical University                             | The Fourth Affiliated Hospital of Anhui Medical University ethics committee | Hefei, China    |
| Dr Ben-Kang Shi   | Department of Urology, Qilu hospital of Shandong university, Shandong University                              | Qilu hospital ethics committee                                              | Jinan, China    |
| Dr Li-Cheng Wu    | Department of Urology, Tongji Hospital, Tongji Medical College, Huazhong University of Science and Technology | Tongji hospital ethics committee                                            | Wuhan, China    |
| Dr Jian-Bin Bi    | Department of Urology, The first hospital of China Medical University                                         | The first hospital of China Medical University ethics committee             | Shenyang, China |
| Dr Bin Hu         | Department of Urology, Liaoning Cancer hospital                                                               | Liaoning Cancer hospital ethics committee                                   | Shenyang, China |
| Dr Wan-Hai Xu     | Department of Urology, The 4th Affiliated Hospital of Harbin Medical University                               | The 4th Affiliated Hospital of Harbin Medical University ethics committee   | Harbin, China   |
| Dr Yi-Fei Liu     | Department of Urology, Tangshan center hospital                                                               | Tangshan center hospital ethics committee                                   | Tangshan, China |
| Dr Lie-Fu Ye      | Department of Urology, Fujian provincial hospital                                                             | Fujian provincial hospital ethics committee                                 | Fuzhou, China   |
| Dr Guo-lin Lei    | Department of Urology, The people's hospital of Jianyang city                                                 | The people's hospital of Jianyang city ethics committee                     | Jianyang, China |
| Dr Jian-Hua Lan   | Department of Urology, West China - Guang'an hospital, Sichuan university                                     | Guang'an hospital hospital ethics committee                                 | Guang'an, China |
| Dr Ying-Li Yang   | Department of Urology, Cangxi people's hospital                                                               | Cangxi people's hospital ethics committee                                   | Cangxi, China   |
| Dr Wen Luo        | Department of Urology, Gulin people's hospital                                                                | Gulin people's hospital ethics committee                                    | Gulin, China    |
| Dr Jian-Tong Cai  | Department of Urology, Shishi Hospital                                                                        | Shishi hospital ethics committee                                            | Shishi, China   |
| Dr Xu-Lai Tao     | Department of Urology, Yiyuan Hospital                                                                        | Yiyuan hospital ethics committee                                            | Yiyuan, China   |
